# Supplementary material for: Non-invasive biomarkers of Fontan-associated liver disease
Source: PubMed Central journal article supplement — JHEP Rep. 2021 Sep 14;3(6):100362. doi: 10.1016/j.jhepr.2021.100362 (PMC8517550; doi:10.1016/j.jhepr.2021.100362), 2021-09-14
Supplement: mmc1.pdf [file mmc1.pdf]

# Non-invasive biomarkers of fontan-associated liver disease

Juliet Emamaullee, Sara Khan, Carly Weaver, Cameron Goldbeck, George Yanni, Rohit Kohli, Yuri Genyk, Shengmei Zhou, Nick Shillingford, Patrick M. Sullivan, Cheryl Takao, Jon Detterich, Paul F. Kantor, John D. Cleveland, Cynthia Herrington, S. Ram Kumar, Vaughn Starnes, Sarah Badran, Neil D. Patel

## Table of contents

|               |   |
|---------------|---|
| Fig. S1.....  | 2 |
| Fig. S2.....  | 3 |
| Table S1..... | 4 |
| Table S2..... | 5 |

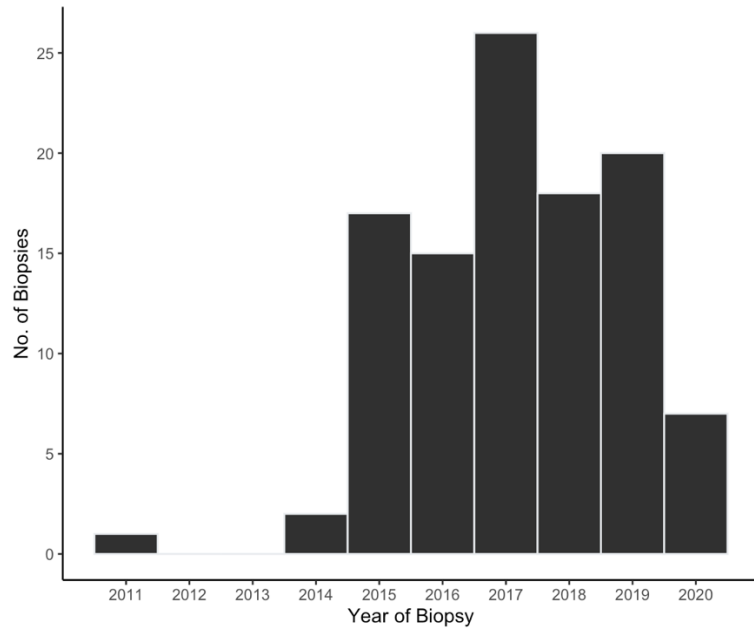

**Fig. S1. Temporal distribution of liver biopsies.**

A. APRI

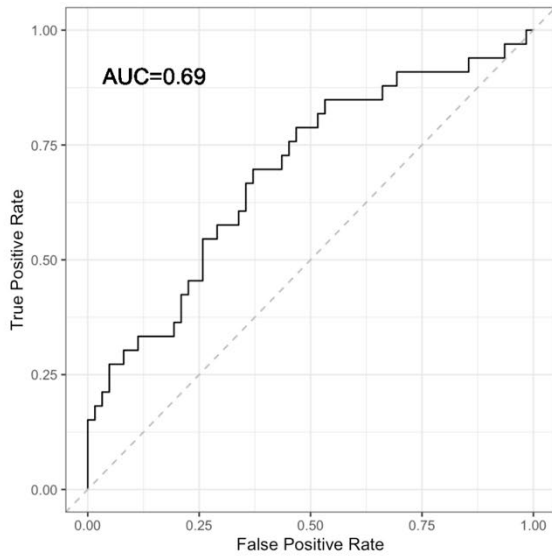

B. FIB-4

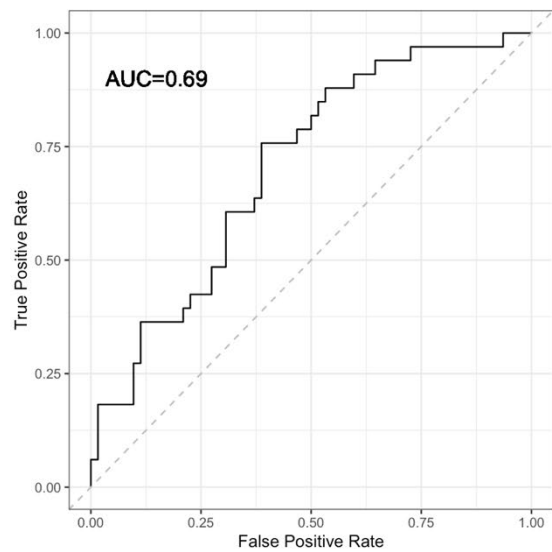

**Fig. S2: Receiver Operating Characteristic (ROC) curve generated from the predicted probabilities of a logistic regression model using APRI Score (A) and FIB-4 Score (B) to predict CHFS group.** The grey line represents a null predictor. For both scores, the observed Area Under the Curve (AUC) is 0.69, demonstrating moderate predictive ability.

| <b>Biopsy and catheterization indications</b> | <b>n (%)</b> |
|-----------------------------------------------|--------------|
| Routine surveillance                          | 76 (71.7%)   |
| Pre-heart transplant                          | 9 (8.5%)     |
| Possible PA intervention                      | 8 (7.5%)     |
| PLE                                           | 5 (4.7%)     |
| Assess PVR                                    | 3 (2.8%)     |
| Decreased exercise tolerance/desaturations    | 2 (1.9%)     |
| Valve stenosis                                | 2 (1.9%)     |
| Autopsy                                       | 1 (0.9%)     |

**Table S1. Indications for liver biopsy and cardiac catheterization (All patients).**

| Variable, N (%)                                             | Total<br>N=106 | CHFS 0-<br>2B<br>N=69 | CHFS 3-<br>4<br>N=37 | P-value |
|-------------------------------------------------------------|----------------|-----------------------|----------------------|---------|
| <b>Cardiac Assessment</b>                                   |                |                       |                      |         |
| <b>Decreased ventricular function, N (%)</b>                |                |                       |                      |         |
| Mild                                                        | 13 (12.3)      | 9 (13)                | 4 (10.8)             | 0.09    |
| Moderate/Severe                                             | 7 (6.6)        | 2 (2.9)               | 5 (13.5)             |         |
| <b>Atrioventricular valve insufficiency, N (%)</b>          |                |                       |                      |         |
| Mild                                                        | 34 (32.1)      | 24 (34.8)             | 10 (27)              | 0.89    |
| ≥Moderate                                                   | 29 (27.4)      | 19 (27.5)             | 10 (27)              |         |
| <b>Aortic insufficiency, N (%)</b>                          |                |                       |                      |         |
| Mild                                                        | 30 (28.3)      | 17 (24.6)             | 13 (35.1)            | 0.32    |
| ≥ Moderate                                                  | 3 (2.8)        | 2 (2.9)               | 1 (2.7)              |         |
| <b>Cardiac catheterization</b>                              |                |                       |                      |         |
| Fontan pressure, mmHg, mean ± SD                            | 12.9 ± 3.2     | 12.4 ± 2.2            | 13.9 ± 4.3           | 0.23    |
| Cardiac Index, L/min/m <sup>2</sup> , mean ± SD             | 3.2 ± 1.4      | 3.2 ± 0.7             | 3.4 ± 2.2            | 0.37    |
| Pulmonary Vascular Resistance, Woods Units/sq.m., mean ± SD | 1.7 ± 0.7      | 1.8 ± 0.7             | 1.7 ± 0.8            | 0.35    |
| End Diastolic Pressure, mmHg, mean ± SD                     | 7.0 ± 2.6      | 6.6 ± 1.9             | 7.8 ± 3.5            | 0.28    |
| Transhepatic Gradient, mmHg, mean ± SD                      | 1.1 ± 0.5      | 1.1 ± 0.6             | 1.2 ± 0.4            | 0.25    |
| <b>Liver Assessment</b>                                     |                |                       |                      |         |
| <b>Steatosis on Liver Biopsy, N (%)</b>                     |                |                       |                      |         |
| Presence of steatosis                                       | 11 (10.4)      | 5 (7.2)               | 6 (16.2)             | 0.19    |
| Steatosis and Hispanic (% of population with steatosis)     | 7 (63.6)       | 4 (80.0)              | 3 (50.0)             | 0.55    |
| Percent if yes, mean [Range]                                | 11.4 [1-50]    | 9.9 [1-50]            | 12.9 [5-40]          | 0.27    |
| 1-5%                                                        | 5 (45.5)       | 3 (6)                 | 2 (33.3)             | 0.99    |
| 6-10%                                                       | 3 (27.3)       | 1 (20)                | 2 (33.3)             |         |
| >11%                                                        | 3 (27.3)       | 1 (20)                | 2 (33.3)             |         |
| <b>Abdominal Ultrasound, N (%)*</b>                         |                |                       |                      |         |
| Normal study                                                | 16 (61.5)      | 12 (70.6)             | 4 (44.4)             | 0.23    |
| Hepatomegaly/Hepatosplenomegaly                             | 10 (38.5)      | 5 (29.4)              | 5 (55.6)             |         |
| <b>Medications, N (%)</b>                                   |                |                       |                      |         |
| ACE inhibitors                                              | 58 (54.7)      | 41 (59.4)             | 17 (45.9)            | 0.31    |
| Aspirin                                                     | 86 (81.1)      | 61 (88.4)             | 25 (67.6)            | 0.05    |

|                 |           |           |          |      |
|-----------------|-----------|-----------|----------|------|
| Beta blockers   | 6 (5.7)   | 3 (4.3)   | 3 (8.1)  | 0.41 |
| Digoxin         | 11 (10.4) | 9 (13)    | 2 (5.4)  | 0.33 |
| Diuretics       | 26 (24.5) | 16 (23.2) | 10 (27)  | 0.63 |
| PDE5 inhibitors | 16 (15.1) | 10 (14.5) | 6 (16.2) | 0.78 |
| Spironolactone  | 14 (13.2) | 9 (13)    | 5 (13.5) | 0.99 |
| Warfarin        | 9 (8.5)   | 4 (5.8)   | 5 (13.5) | 0.27 |

\*Only available in 17 patients, within 3 months prior to or 1-year post-biopsy.

**Table S2. Cardiac function, liver assessment, and medications at the time of biopsy.** Additional clinical statistics of the overall cohort and stratified by CHFS group. Means and standard deviations reported for continuous variables and tested using a T-test. For highly non-normal distributions, medians and interquartile ranges reported and tested using Mann-Whitney U-test. Counts and percentages reported for categorical variables and tested with a Chi-Square test.
